# Supplementary material for: Interface engineering of hierarchical NiCoP/NiCoSx heterostructure arrays for efficient alkaline hydrogen evolution at large current density
Source: Royal Society of Chemistry journal article supplement (doi:10.1039/d2nr04657a), 2022-01-01
Supplement: d2nr04657a1.pdf [file d2nr04657a1.pdf]

Electronic Supporting Information

**Interface Engineering of Hierarchical NiCoP/NiCoS<sub>x</sub> Heterostructure  
Arrays for Efficient Alkaline Hydrogen Evolution at Large Current  
Density**

Weiwei Han,<sup>a</sup> Fan Zhang,<sup>a</sup> Lingshu Qiu,<sup>a</sup> Yang Qian,<sup>a</sup> Shaoyun Hao,<sup>a</sup> Ping Li,<sup>b</sup> Yi He,<sup>a</sup> Xingwang Zhang,  
\*ab

- a. Key Laboratory of Biomass Chemical Engineering of Ministry of Education, College of Chemical and Biological Engineering, Zhejiang University, Hangzhou, Zhejiang Province 310027, China.
- b. Institute of Zhejiang University-Quzhou, Quzhou, Zhejiang Province 324000, China.

\*Corresponding author E-mail: xwzhang@zju.edu.cn

## 1. Experimental section

### 1.1 Materials and chemicals

Nickel (II) chloride hexahydrate ( $\text{NiCl}_2 \cdot 6\text{H}_2\text{O}$ , 98.0%), cobalt (II) chloride hexahydrate ( $\text{CoCl}_2 \cdot 6\text{H}_2\text{O}$ , AR), thiourea ( $\text{CH}_4\text{N}_2\text{S}$ , 99.0%), sodium hypophosphite ( $\text{NaH}_2\text{PO}_2$ , 99.0%), sodium citrate dihydrate ( $\text{C}_6\text{H}_5\text{Na}_3\text{O}_7 \cdot 2\text{H}_2\text{O}$ , 99.0%) were purchased from Aladdin Reagent (Shanghai) Co., Ltd. Potassium hydroxide (KOH, 85.0%), hydrochloric acid (HCl, 36–38%), ethanol and acetone were purchased from Sinopharm Chemical Reagent Co., Ltd. Commercial Pt/C (20 wt%) was purchased from Macklin Biochemical Technology Co., Ltd. Nafion solution (5 wt%) was bought from Du Pont Company. Ni foam (thickness: 1 mm, porosity: ca. 95%) was bought from Jiashide Foam Metal Co., Ltd (Suzhou, China). Ultrapure Milli-Q water ( $18.2 \text{ M}\Omega \text{ cm}^{-1}$ ) was used for all experiments.

### 1.2 Materials synthesis

#### 1.2.1 Synthesis of $\text{NiCoS}_x/\text{NF}$

Prior to preparation, Ni foam (NF) was cut into small pieces ( $1.0 \times 1.5 \text{ cm}$ ). Then the pieces were cleaned ultrasonically several times in acetone, HCl (3 M), ethanol and ultrapure water followed by vacuum drying overnight at  $40 \text{ }^\circ\text{C}$ .  $\text{NiCoS}_x/\text{NF}$  was prepared using a cyclic voltammetry (CV) electrodeposition method in a three-electrode cell. NF, Pt plate and saturated calomel electrode (SCE) were used as the working electrode, counter electrode and reference electrode, respectively. 40 mL of solution containing 0.05 M  $\text{NiCl}_2 \cdot 6\text{H}_2\text{O}$ , 0.125 M  $\text{CoCl}_2 \cdot 6\text{H}_2\text{O}$  and 0.5 M  $\text{CH}_4\text{N}_2\text{S}$  were used as electrolyte. CV was performed in the range of  $-1.3 \sim 0.3 \text{ V}$  vs. SCE at a scan rate of  $5 \text{ mV s}^{-1}$  for 4 cycles under stirring. Subsequently, the obtained electrode was rinsed with ultrapure water and dried at  $40 \text{ }^\circ\text{C}$  in a vacuum oven. The  $\text{NiS}_x/\text{NF}$  was synthesized using the same method without the addition of  $\text{CoCl}_2 \cdot 6\text{H}_2\text{O}$  in the electrolyte. In addition, the optimization of catalyst electrodeposition conditions was design by single variable method as shown in the **Table S1–S3**.

#### 1.2.2 Synthesis of $\text{NiCoP}/\text{NiCoS}_x/\text{NF}$

The nickel-cobalt phosphide (NiCoP) layer was then coated on the surface of  $\text{NiCoS}_x/\text{NF}$  by electrodeposition, too. The electrolyte contained 55 mM  $\text{CoCl}_2 \cdot 6\text{H}_2\text{O}$ , 33 mM  $\text{NiCl}_2 \cdot 6\text{H}_2\text{O}$ , 20 mM  $\text{C}_6\text{H}_5\text{Na}_3\text{O}_7 \cdot 2\text{H}_2\text{O}$  and 0.2 M  $\text{NaH}_2\text{PO}_2$ . The graphite rod and Ag/AgCl electrode were employed as the counter electrode and reference electrode, respectively. The electrodeposition process was

carried out at a constant potential of  $-1.2$  V vs. Ag/AgCl for 25 min, then the obtained electrode was rinsed with ultrapure water and dried in vacuum at  $40$  °C. In order to determine optimal deposition time, a series of CoP/NiS<sub>x</sub>/NF were prepared by applying different electrodeposition time. In addition, CoP/NF, NiCoP/NF, CoP/NiCoS<sub>x</sub>/NF were also prepared without the addition of corresponding precursors under the same depositional conditions. The masses of loaded catalysts on NF are about  $2.0$ , and  $5.8$  mg cm<sup>-2</sup> for NiCoS<sub>x</sub>/NF and NiCoP/NiCoS<sub>x</sub>/NF, respectively.

### 1.3 Materials characterization

The crystalline structures of samples were characterized by X-ray diffractometer (XRD, PANalytical B.V. X-pert Powder, Cu K $\alpha$  =  $1.5406$  Å). Scanning electron microscopy (SEM, Hitachi SU-70) and transmission electron microscope (TEM, FEI Tecnai G2 F20 S-TWIN) equipped with energy dispersive X-Ray spectrometer (EDX) were used to characterize the morphology. Raman spectra was conducted on a LabRAM HR Evolution spectrometer combined with a  $633$  nm excitation laser. The valence states and binding energy of materials were obtained by X-ray photoelectron spectrometer (XPS, Thermo Scientific K-Alpha) with an Al K $\alpha$  excitation source. The contact angle (CA) measurements were performed by LAUDA OSA200-T.

### 1.4 Electrochemical Measurements

Electrochemical measurements were carried out using a standard three-electrode system on a Bio-Logic VSP potentiostat with  $1$  M KOH as the electrolyte. The as-prepared materials ( $1.0 \times 0.7$  cm) were employed as the working electrodes, while graphite rod and Hg/HgO electrode were used as the counter electrode and reference electrode, respectively. Unless otherwise stated, all the potentials with  $iR$  compensation were referred to the reversible hydrogen electrode (RHE) by the Nernst equation unless otherwise stated:

$$E_{\text{RHE}} = E_{\text{Hg/HgO}} + 0.098 \text{ V} + 0.0591 \times \text{pH} \quad (\text{S1})$$

The linear sweep voltammetry (LSV) measurements were conducted at a scan rate of  $5$  mV s<sup>-1</sup>. The electrochemical impedance spectroscopy (EIS) was recorded at  $-1.1$  V vs. Hg/HgO in a frequency range of  $100$  kHz to  $0.01$  Hz with an amplitude of  $5$  mV. The uncompensated resistance ( $R$ ) was determined by fitting the EIS data to an equivalent electrical circuit. Double-layer capacitances ( $C_{\text{dl}}$ ) could be assessed by cyclic voltammetry (CV) from  $0.1$  to  $0.2$  V vs. RHE with different scan rates ranging from  $20$  to  $140$  mV s<sup>-1</sup>. The long-term stability was investigated by chronopotentiometry

(CP) measurements and CV at a scan rate of 100 mV s<sup>-1</sup>. Moreover, the commercial Pt/C was deposited on Ni foam as the comparative electrode. Specially, 10 mg Pt/C (20 wt%) and 10 μL of Nafion solution (5 wt%) was dispersed in 1 ml mixture of ethanol and water (1: 3, v: v) under the ultrasonic wave. Then 200 μL of ink was coated on Ni foam followed by drying at room temperature.

### 1.5 Theoretical calculations

The density functional theory (DFT) calculations were performed using Vienna ab initio simulation package (VASP)<sup>1-3</sup> within periodic models. Generalized gradient approximation (GGA) with projector augmented wave (PAW) method was applied in calculations to simulate the electronic structures and the core-electron interaction. The energy cutoff was set to be 450 eV. The spin polarization effect was considered in this work, and the initial magnetic moments of Ni and Co were set to 5. To improve the description of the d electrons, here the Hubbard DFT+U method was employed. The effective U values for Ni and Co d orbitals were 3.4 and 6 eV, respectively.<sup>4</sup> Structural optimizations were performed until the residual forces on each ion converged to smaller than 0.05 eV Å<sup>-1</sup>. To simplify the calculation, NiCo<sub>2</sub>S<sub>4</sub> was chose in place of NiCoS<sub>x</sub>. The lattice parameters of NiCoP and NiCo<sub>2</sub>S<sub>4</sub> were optimized by 8×8×12 and 5×5×5 k-meshes, respectively. Using the optimized lattice parameters, six-layer NiCoP (001) and twelve-layer NiCo<sub>2</sub>S<sub>4</sub> (111) facets were built. The bottom half layers were fixed while the other atoms were fully relaxed during all of the calculations involving the two surfaces. The 2×2×1 k-meshes were utilized to describe the surface Brillouin zone. The NiCoP/NiCo<sub>2</sub>S<sub>4</sub> heterojunction were built by combing the NiCoP (001) and NiCo<sub>2</sub>S<sub>4</sub> (111) facets. The width of vacuum layer for all the surface structures and heterojunction was set larger than 12 Å to avoid spurious interaction. The adsorption energy of H species on the considered slabs is defined as:

$$\Delta E_{\text{H}} = E_{\text{slab+H}} - E_{\text{slab}} - 0.5E_{\text{H}_2(\text{g})} \quad (\text{S2})$$

where  $E_{\text{slab+H}}$  means the total energy of slab and adsorbed atomic H,  $E_{\text{slab}}$  denotes the slab energy and  $E_{\text{H}_2(\text{g})}$  represents the energy of the H<sub>2</sub> species in gas phase. The entropy ( $TS$ ) and zero-point energy ( $E_{\text{ZPE}}$ ) are also involved in calculations to obtain the Gibbs free adsorption energy of adsorbed atomic H:

$$\Delta G_{\text{H}} = \Delta E_{\text{H}} + \Delta E_{\text{ZPE}} - T\Delta S \quad (\text{S3})$$

## 2. Supplementary calculation methods.

### 2.1 Calculation of electrochemical active surface area.

The electrochemical active surface area (ECSA) can be estimated from the electrochemical double-layer capacitance ( $C_{dl}$ ) of the catalysts by the following equation:

$$ECSA = \frac{C_{dl}}{C_s} \quad (S4)$$

where  $C_s$  is the specific capacitance for a flat surface ranging between 20 and 60  $\mu\text{F cm}^{-2}$ , and it was assumed as the average value of 40  $\mu\text{F cm}^{-2}$  in this work.

The  $C_{dl}$  values can be derived from the CV curves in **Figure S7**, according to the equation below:

$$\Delta j/2 = v \times C_{dl} \quad (S5)$$

where  $\Delta j$  corresponds to the difference between anodic and cathodic current density ( $j_{\text{anode}} - j_{\text{cathode}}$ ) at 0.15 V vs. RHE,  $v$  is the corresponding scan rate. The fitted slope of the curve ( $\Delta j/2$  against  $v$ ) is equal to the  $C_{dl}$  value.

### 2.2 Calculation of turnover frequency.

The turnover frequency (TOF) for HER were calculated on the hypothesis that all the active sites were involved in the electrocatalytic process based on previous reports.

$$\text{TOF} = \frac{\text{\#total H}_2 \text{ turn overs/cm}^2 \text{ geometric area}}{\text{\#surface sites/cm}^2 \text{ geometric area}} \quad (S6)$$

The total number of H<sub>2</sub> turn overs was determined by the current density from the LSV curves using the following equation:

$$\begin{aligned} \#_{\text{H}_2} &= \left( j \frac{\text{mA}}{\text{cm}^2} \right) \left( \frac{1 \text{ C s}^{-1}}{1000 \text{ mA}} \right) \left( \frac{1 \text{ mol e}^-}{96485 \text{ C}} \right) \left( \frac{1 \text{ mol H}_2}{2 \text{ mol e}^-} \right) \left( \frac{6.022 \times 10^{23} \text{ mol H}_2}{1 \text{ mol H}_2} \right) \\ &= 3.12 \times 10^{15} \frac{\text{H}_2/\text{s}}{\text{cm}^2} \text{ per } \frac{\text{mA}}{\text{cm}^2} \end{aligned} \quad (S7)$$

The number of effective surface sites was calculated based on the following equation:

$$\frac{\text{\#surface sites}}{\text{cm}^2 \text{ geometric area}} = \frac{\text{\#active sites(flat standard)}}{\text{cm}^2 \text{ geometric area}} \times \text{Roughness factor} \quad (S8)$$

Where the roughness factor is determined by  $A_{\text{ECSA}}$ , and the number of the surface active sites per real surface area is demonstrated by the following calculation formula:

$$\# \text{active sites} = \left( \frac{\text{number of atoms per unit cell}^{\frac{2}{3}}}{\text{unit cell volume}} \right) \quad (\text{S9})$$

Here, since the exact hydrogen binding sites were unclear, we conservatively took the number of active sites for NiCoP/NiCoS<sub>x</sub> was about  $1.1573 \times 10^{15} \text{ atoms cm}_{\text{real}}^{-2}$  which was deduced from the average value of NiCoP ( $1.707 \times 10^{15} \text{ atoms cm}_{\text{real}}^{-2}$ ) and NiCo<sub>2</sub>S<sub>4</sub> ( $6.076 \times 10^{14} \text{ atoms cm}_{\text{real}}^{-2}$ ).

As a result, LSV plot can be converted into a TOF plot through the following formula:

$$\text{TOF} = \frac{\left( 3.12 \times 10^{15} \frac{\text{H}_2/\text{s}}{\text{cm}^2} \text{ per } \frac{\text{mA}}{\text{cm}^2} \right) \times |j|}{\# \text{active sites} \times A_{\text{ECSA}}} \quad (\text{S10})$$

### 2.3 Calculation of Faradaic efficiency.

To calculate the Faradaic efficiency (FE) of HER, chronopotentiometry was conducted at 100 mA in the H-type electrolytic cell. The evolved H<sub>2</sub> volume was measured by water drainage method synchronously. The FE can be calculated with the following equation:

$$\text{FE}\% = \frac{znF}{Q} \times 100\% \quad (\text{S11})$$

where  $z$ ,  $n$ ,  $F$  and  $Q$  represent the number of electrons transferred for a hydrogen molecule, moles of produced H<sub>2</sub> measured from the volume of H<sub>2</sub>, the Faraday constant (96485 C mol<sup>-1</sup>) and the total electric quantity applied, respectively.

**Table S1.** The influence of deposition cycles on NiS<sub>x</sub>/NF catalytic performance.

| Ni <sup>2+</sup> (mol L <sup>-1</sup> ) | CH <sub>4</sub> N <sub>2</sub> S (mol L <sup>-1</sup> ) | Deposition cycles |
|-----------------------------------------|---------------------------------------------------------|-------------------|
| 0.05                                    | 0.75                                                    | 1                 |
|                                         |                                                         | 4                 |
|                                         |                                                         | 7                 |
|                                         |                                                         | 10                |

**Table S2.** The influence of the concentration of thiourea on NiS<sub>x</sub>/NF catalytic performance.

| Ni <sup>2+</sup> (mol L <sup>-1</sup> ) | CH <sub>4</sub> N <sub>2</sub> S (mol L <sup>-1</sup> ) | Deposition cycles |
|-----------------------------------------|---------------------------------------------------------|-------------------|
| 0.05                                    | 0.25                                                    | 4                 |
|                                         | 0.5                                                     |                   |
|                                         | 0.75                                                    |                   |
|                                         | 1                                                       |                   |

**Table S3.** The influence of molar ratio of Co<sup>2+</sup>/Ni<sup>2+</sup> on NiCoS<sub>x</sub>/NF catalytic performance.

| Ni <sup>2+</sup> (mol L <sup>-1</sup> ) | Co <sup>2+</sup> /Ni <sup>2+</sup> molar ratio | CH <sub>4</sub> N <sub>2</sub> S (mol L <sup>-1</sup> ) | Deposition cycles |
|-----------------------------------------|------------------------------------------------|---------------------------------------------------------|-------------------|
| 0.05                                    | 1:1                                            | 0.5                                                     | 4                 |
|                                         | 2:1                                            |                                                         |                   |
|                                         | 5:2                                            |                                                         |                   |
|                                         | 3:1                                            |                                                         |                   |

**Table S4.** Comparison of HER performance of NiCoP/NiCoS<sub>x</sub>/NF with other recently reported HER electrocatalysts in 1 M KOH.

| Electrode                                                               | $\eta_{10}$ (mV) | $\eta_{100}$ (mV) | $\eta_{500}$ (mV) | Tafel slope (mV dec <sup>-1</sup> ) | Stability (h) @ j or E      | Reference                                                   |
|-------------------------------------------------------------------------|------------------|-------------------|-------------------|-------------------------------------|-----------------------------|-------------------------------------------------------------|
| NiCoP/NiCoS <sub>x</sub> /NF                                            | 68               | 144               | 222               | 59                                  | 110@500 mA cm <sup>-2</sup> | This work                                                   |
| PB <sub>0.94</sub> C-DSPH/GCE                                           | 186              | NA                | 364               | 56.5                                | 10@500 mA cm <sup>-2</sup>  | <i>Small Methods</i> , <b>2021</b> , 5, 2000701             |
| Fe-Mo-S/Ni <sub>3</sub> S <sub>2</sub> @NF                              | 141              | 266               | 384               | 123                                 | 24@160 mA cm <sup>-2</sup>  | <i>Chem. Eng. J.</i> , <b>2021</b> , 404, 126483            |
| V-FeP/IF(iron foam)                                                     | NA               | 149               | 246               | 40.97                               | 24@500 mA cm <sup>-2</sup>  | <i>J Colloid Interface Sci</i> , <b>2022</b> , 615, 445-455 |
| Co <sub>2</sub> P-Co <sub>3</sub> O <sub>4</sub> /Ti plate              | 86               | 275               | NA                | 73                                  | 90@500 mA cm <sup>-2</sup>  | <i>Adv. Energy Mater.</i> , <b>2018</b> , 8, 1802445        |
| MoSe <sub>2</sub> -Mo <sub>2</sub> N/Mo                                 | 76               | NA                | <400              | 69.5                                | 30@-0.12 V                  | <i>J. Mater. Chem. A</i> , <b>2021</b> , 9, 26113-26118     |
| Ni <sub>11</sub> (HPO <sub>3</sub> ) <sub>8</sub> (OH) <sub>6</sub> /NF | 121              | 271               | >350              | 102                                 | 24@-0.13 V                  | <i>Energy Environ. Sci.</i> , <b>2018</b> , 11, 1287-1298   |
| F-Co <sub>2</sub> P/Fe <sub>2</sub> P/IF                                | NA               | 151.8             | 229.8             | 115.01                              | 10@500 mA cm <sup>-2</sup>  | <i>Chem. Eng. J.</i> , <b>2020</b> , 399, 125831            |
| Ni NWs/E-Ni mesh                                                        | 87               | 169               | 204               | 75                                  | 100@500 mA cm <sup>-2</sup> | <i>J. Power Sources</i> , <b>2021</b> , 516, 230635         |
| P-Ni <sub>2</sub> P/NF                                                  | 134              | 246               | 420               | 92                                  | 48@500 mA cm <sup>-2</sup>  | <i>Int. J. Hydrog. Energy</i> , <b>2019</b> , 44, 5739-5747 |
| Ni <sub>2(1-x)</sub> Mo <sub>2x</sub> P/NF                              | 72               | 162               | 240               | 46.4                                | 100@-                       | <i>Nano Energy</i> , <b>2018</b> ,                          |

|                                         |    |       |       |       |                                |                                                                     |
|-----------------------------------------|----|-------|-------|-------|--------------------------------|---------------------------------------------------------------------|
|                                         |    |       |       |       | 0.11 V                         | 53, 492–500                                                         |
| CoMoS <sub>x</sub> /NF                  | 89 | NA    | 269   | 94    | 25@500<br>mA cm <sup>-2</sup>  | <i>Angew Chem Int Ed Engl</i> , <b>2020</b> , <i>59</i> , 1659-1665 |
| F <sub>0.25</sub> C <sub>1</sub> CH/NF  | 77 | 180   | 246   | 99    | 136@100<br>mA cm <sup>-2</sup> | <i>Adv. Energy Mater.</i> , <b>2018</b> , <i>8</i> , 1800175        |
| 3F-FeP/IF(Iron foam)                    | NA | 191   | 261   | 56.12 | 24                             | <i>Fuel</i> , <b>2022</b> , <i>316</i> , 123206                     |
| F, P-Fe <sub>3</sub> O <sub>4</sub> /IF | NA | 179.5 | 277.6 | 127.9 | 12@500<br>mA cm <sup>-2</sup>  | <i>J. Mater. Chem. A</i> , <b>2021</b> , <i>9</i> , 15836-15845     |



**Table S5.** Resistance values of different catalysts obtained from fitting electrical equivalent circuit model.

| Sample                | NF    | NiCoS <sub>x</sub> /NF | NiCoP/NF | NiCoP/NiCoS <sub>x</sub> /NF | Pt/C on NF |
|-----------------------|-------|------------------------|----------|------------------------------|------------|
| $R_s$ ( $\Omega$ )    | 2.022 | 1.712                  | 1.431    | 1.375                        | 1.366      |
| $R_{ct}$ ( $\Omega$ ) | 47.84 | 29.16                  | 8.562    | 0.8955                       | 0.3586     |

**Table S6.** Data of d-band centers ( $\epsilon_d$ ).

| Sample                                 | $\epsilon_d$ up | $\epsilon_d$ down | Average $\epsilon_d$ |
|----------------------------------------|-----------------|-------------------|----------------------|
| NiCoP                                  | -3.06           | -2.74             | -2.90                |
| NiCo <sub>2</sub> S <sub>4</sub>       | -3.69           | -2.93             | -3.31                |
| NiCoP/NiCo <sub>2</sub> S <sub>4</sub> | -2.83           | -2.73             | -2.78                |

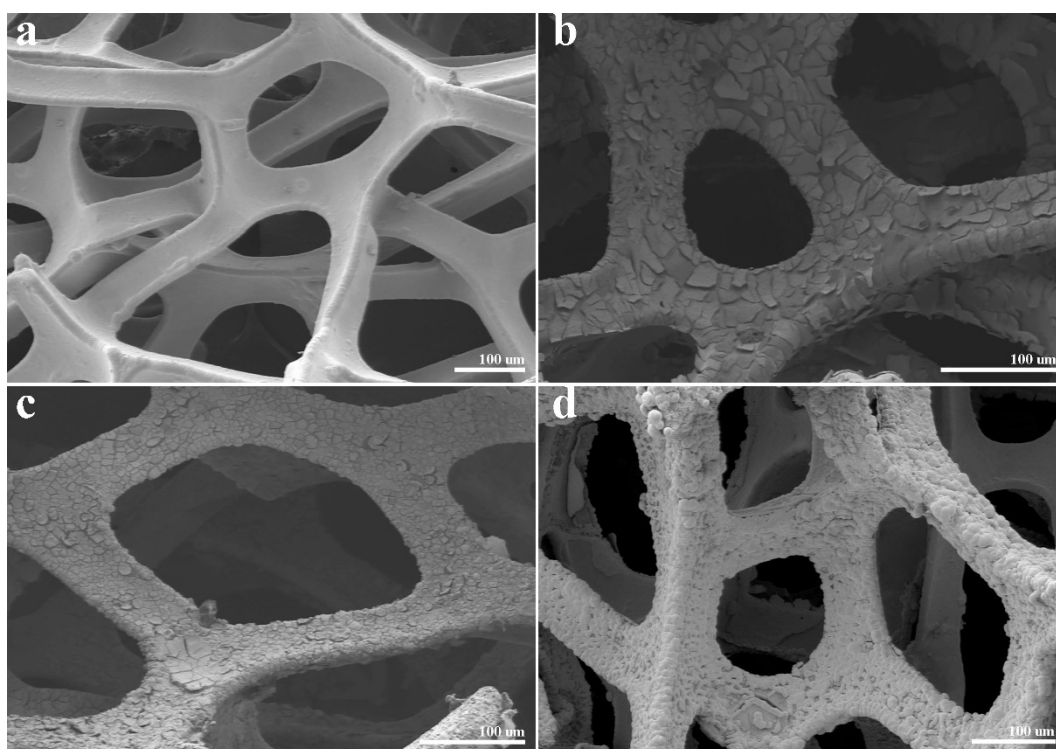

**Figure S1.** SEM images of (a) NF, (b) NiS<sub>x</sub>/NF, (c) NiCoS<sub>x</sub>/NF and (d) NiCoP/NiCoS<sub>x</sub>/NF.

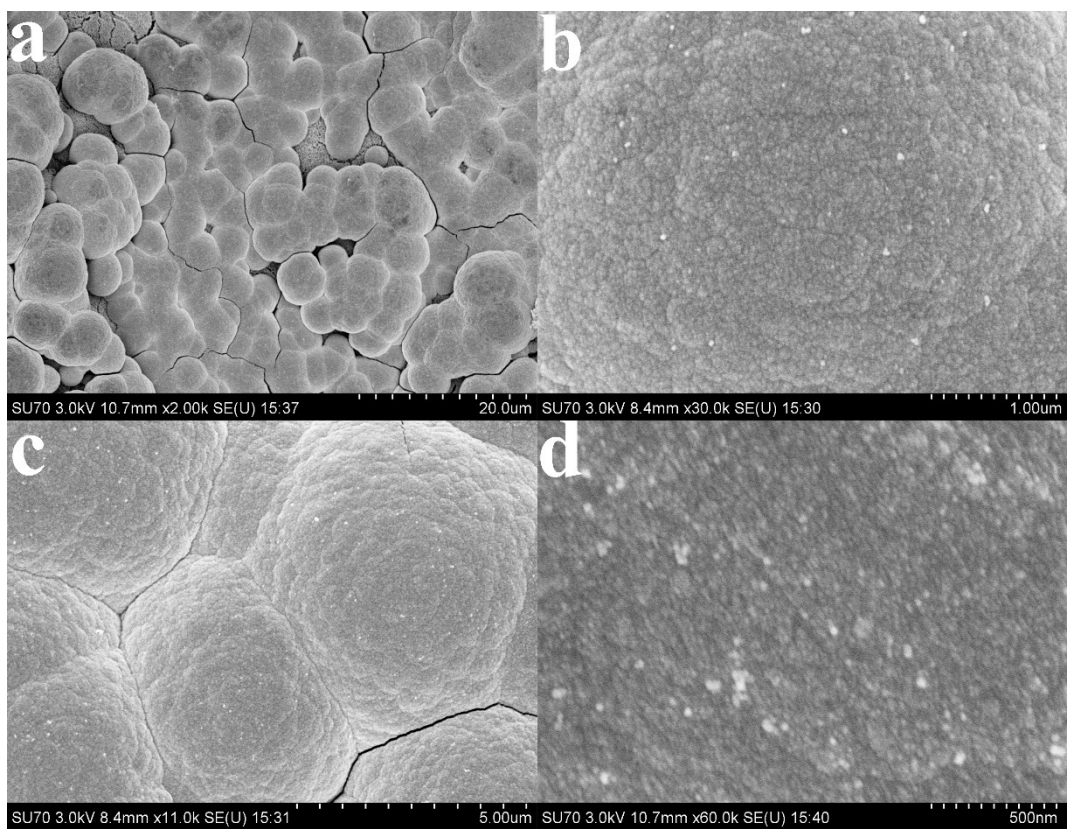

**Figure S2.** Different magnification of SEM images for NiCoP/NiCoS<sub>x</sub>/NF.

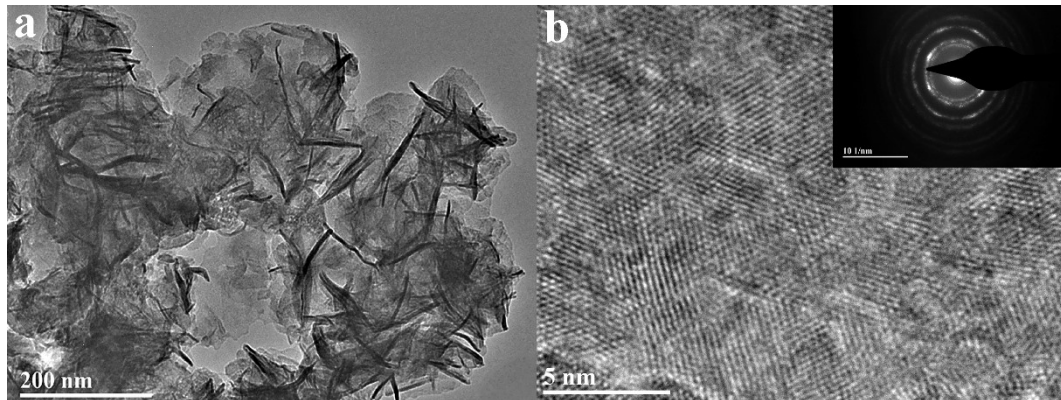

**Figure S3.** (a) TEM image and (b) HRTEM image of NiCoP/NiCoS<sub>x</sub>/NF (the inset of (b) shows the SAED pattern of NiCoP/NiCoS<sub>x</sub>/NF).

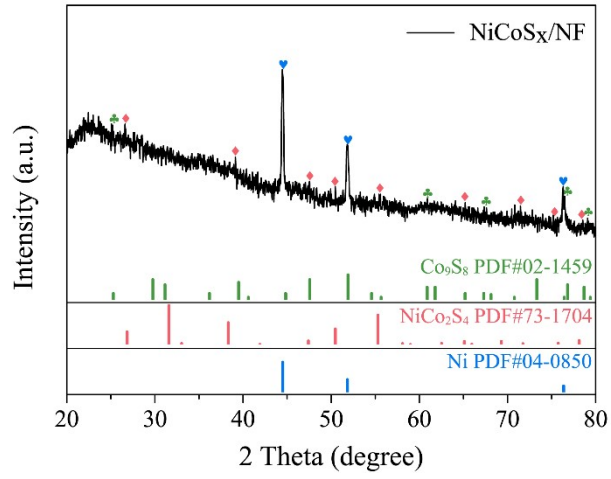

**Figure S4.** XRD pattern of NiCoS<sub>x</sub>/NF.

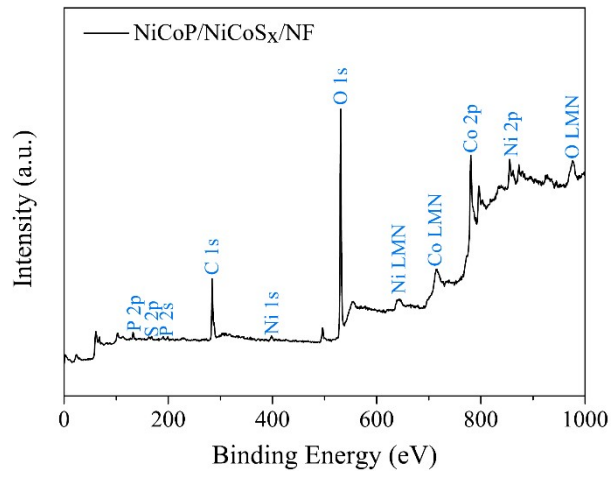

**Figure S5.** XPS survey spectra of NiCoP/NiCoS<sub>x</sub>/NF.

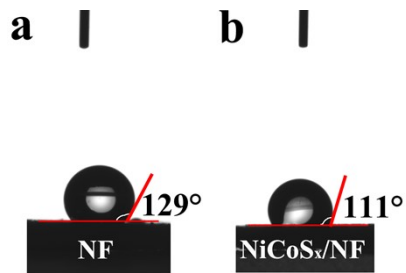

**Figure S6.** Contact angle images of (a) NF and (b) NiCoS<sub>x</sub>/NF.

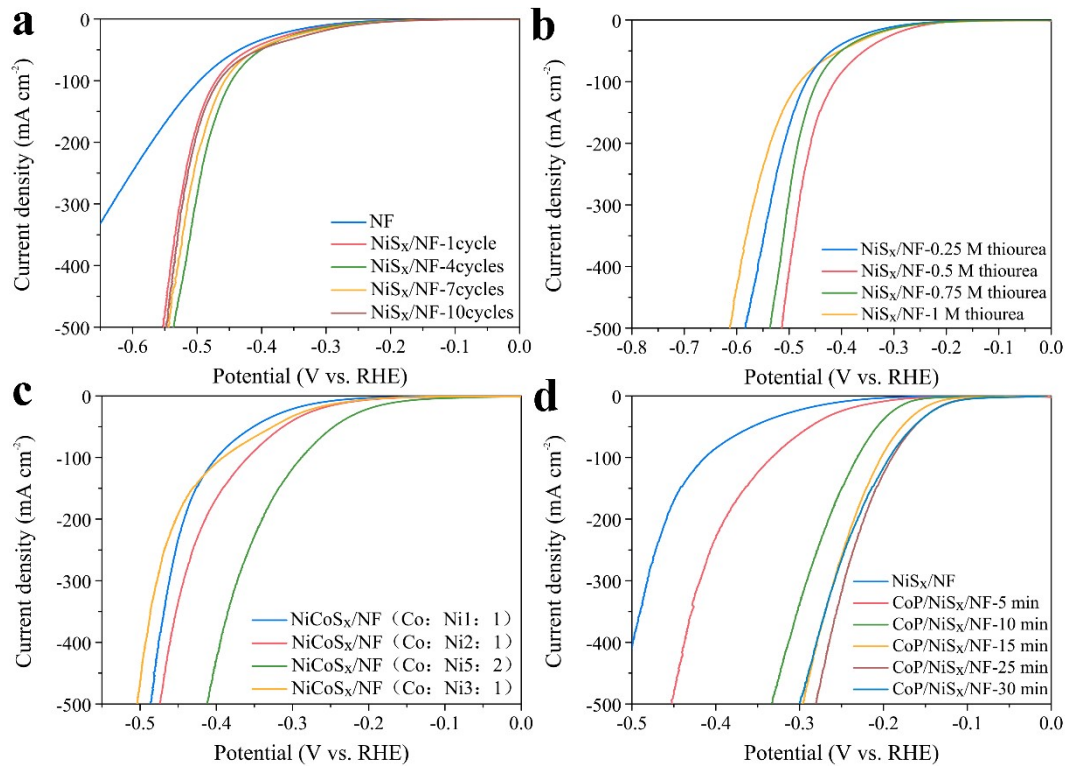

**Figure S7.** HER polarization curves of NiS<sub>x</sub>/NF deposited with (a) different cycles and (b) different concentration of thiourea, (c) polarization curves of NiCoS<sub>x</sub>/NF deposited under different Co/Ni molar ratio, (d) polarization curves of CoP/NiS<sub>x</sub>/NF obtained under different electrodeposition time.

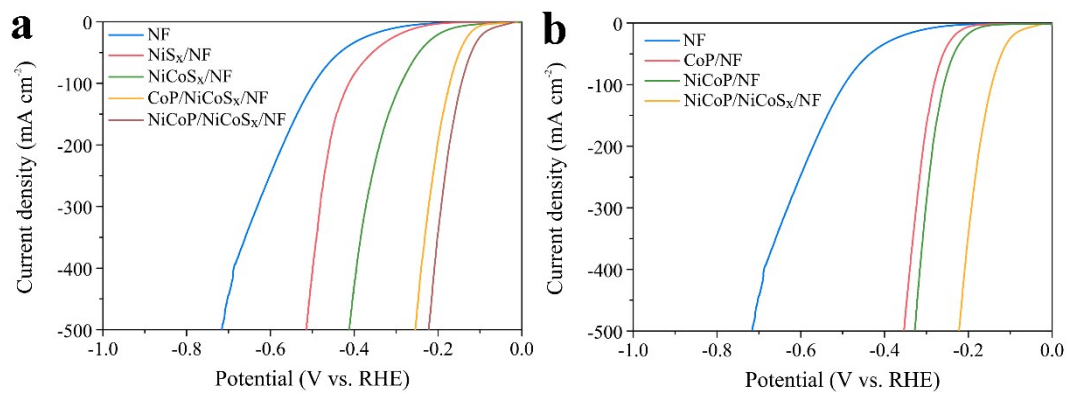

**Figure S8.** Comparison of HER polarization curves (a) based on sulfides and (b) based on phosphides.

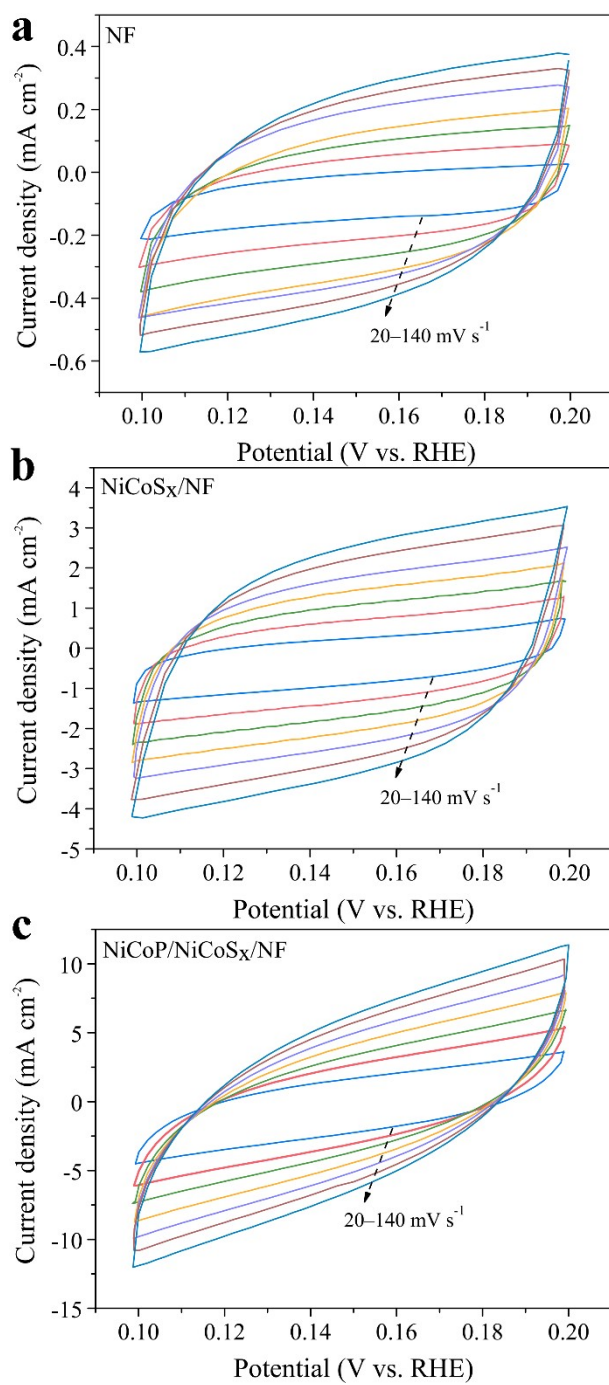

**Figure S9.** CV curves of (a) NF, (b) NiCoS<sub>x</sub>/NF and (c) NiCoP/NiCoS<sub>x</sub>/NF at different scan rates in the potential range of 0.1–0.2 V vs. RHE.

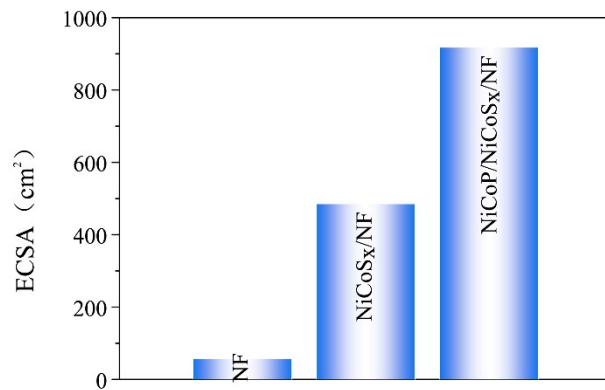

**Figure S10.** The ECSA values of NF, NiCoS<sub>x</sub>/NF, and NiCoP/NiCoS<sub>x</sub>/NF for HER.

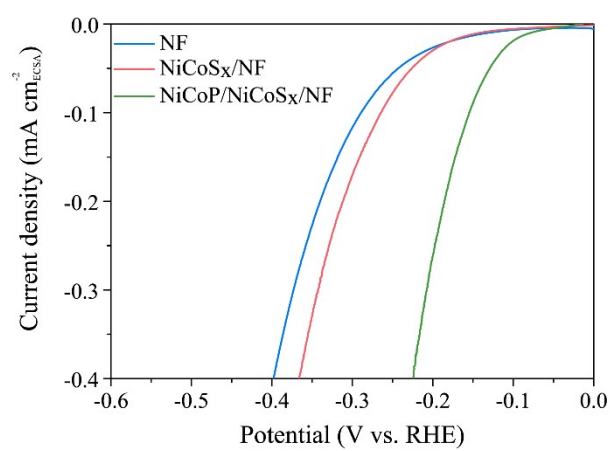

**Figure S11.** ECSA-normalized polarization curves of NF, NiCoS<sub>x</sub>/NF and NiCoP/NiCoS<sub>x</sub>/NF for HER in 1 M KOH.

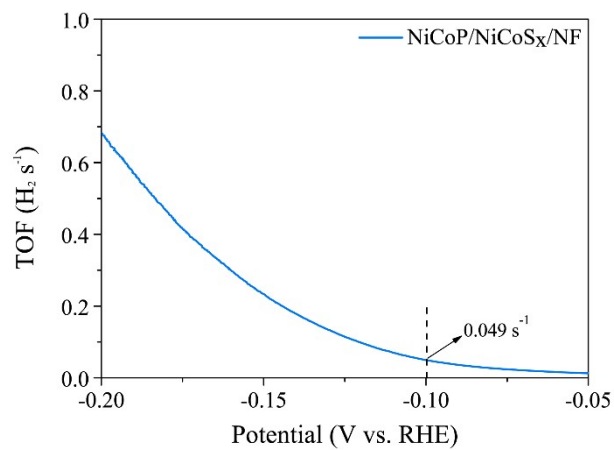

**Figure S12.** Calculated TOF values of NiCoP/NiCoS<sub>x</sub>/NF electrode for HER.

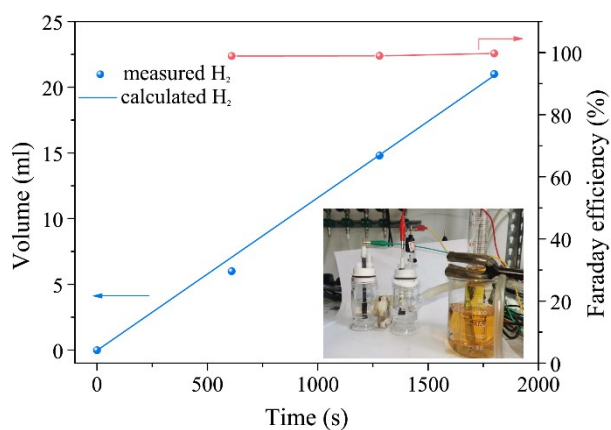

**Figure S13.** Volume of produced H<sub>2</sub> as a function of time and corresponding Faradaic efficiency during HER test at current of 100 mA (Inset: a photograph of the gas collection device).

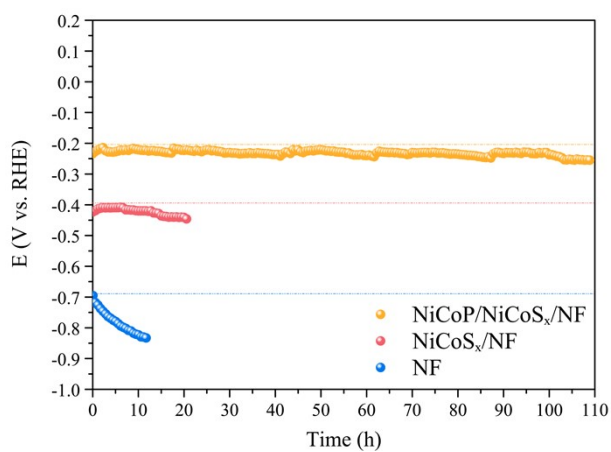

**Figure S14.** Chronopotentiometry curves of NF, NiCoS<sub>x</sub>/NF and NiCoP/NiCoS<sub>x</sub>/NF electrode recorded at 500 mA cm<sup>-2</sup> in 1 M KOH.

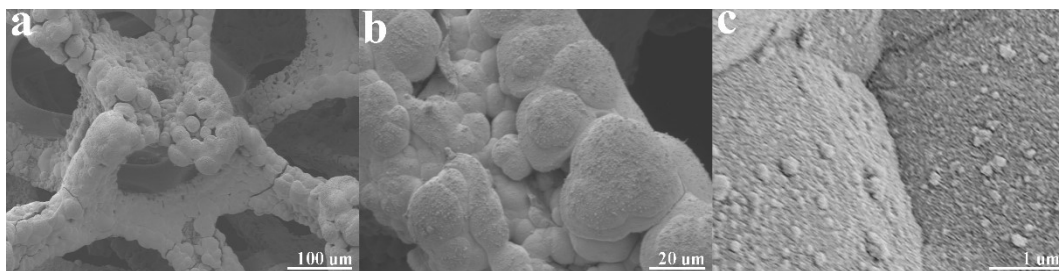

**Figure S15.** SEM images of NiCoP/NiCoS<sub>x</sub>/NF after HER stability test.

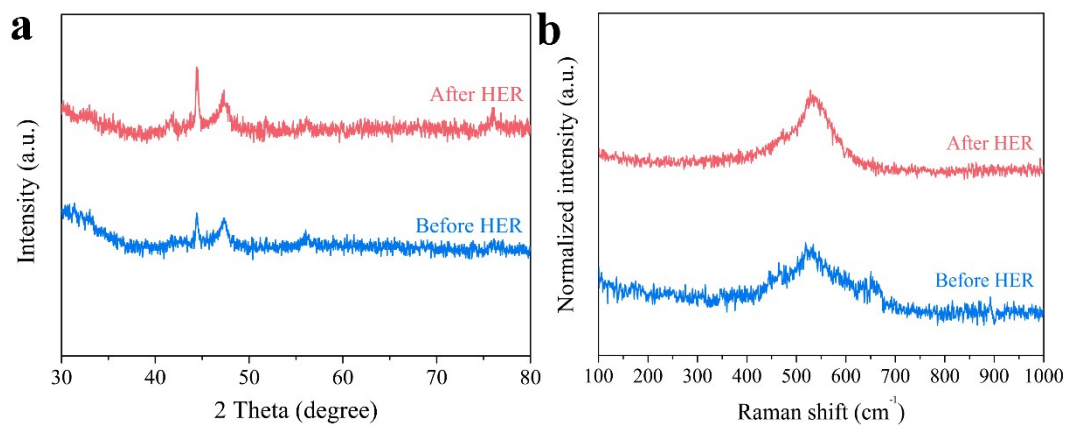

**Figure S16.** (a) XRD pattern (b) Raman spectra of NiCoP/NiCoS<sub>x</sub>/NF before and after HER stability test.

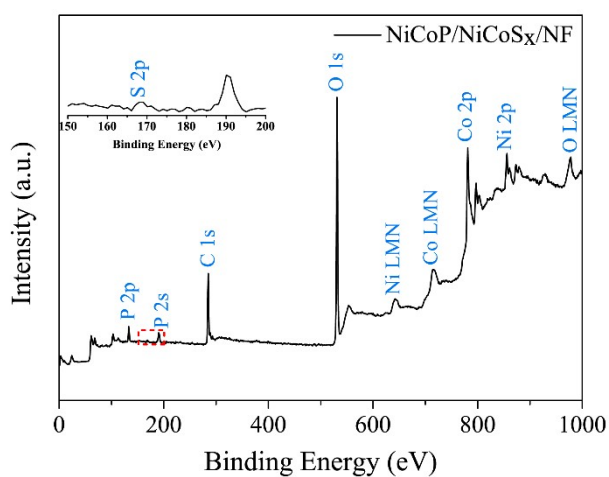

**Figure S17.** XPS survey spectra of NiCoP/NiCoS<sub>x</sub>/NF after HER stability test and the amplified spectrum of S2p (inset).



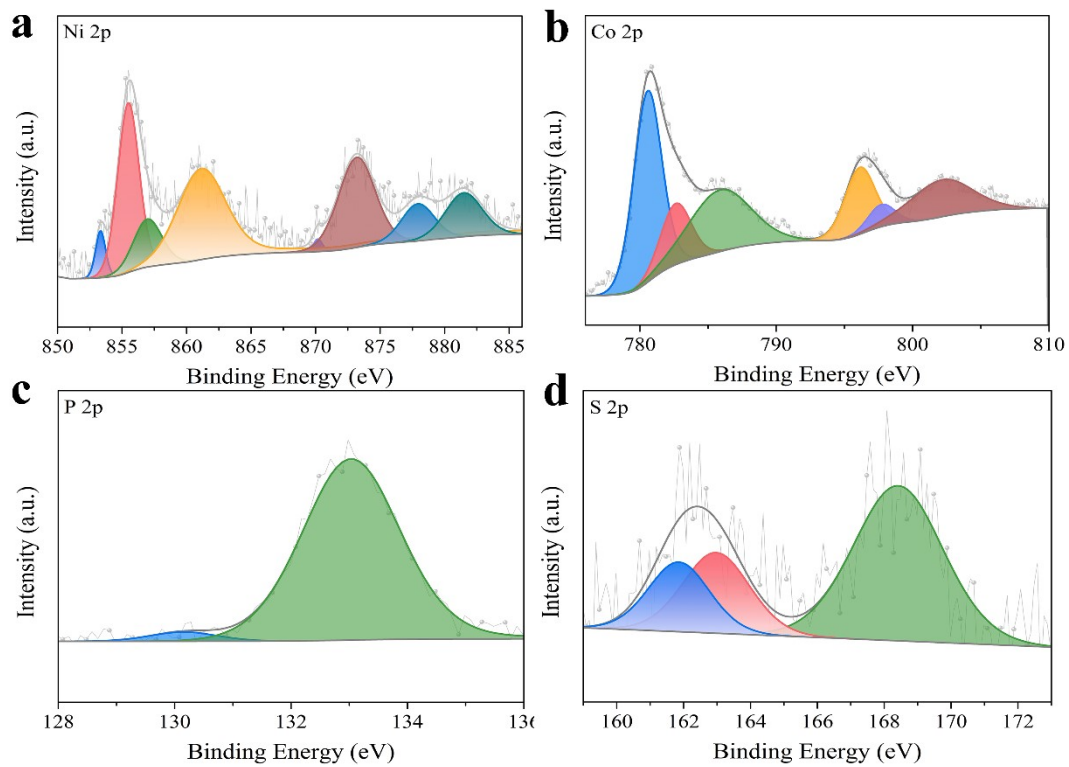

**Figure S18.** High-resolution XPS spectra of NiCoP/NiCoS<sub>x</sub>/NF after HER stability test: (a) Ni 2p, (b) Co 2p, (c) P 2p and (d) S 2p.

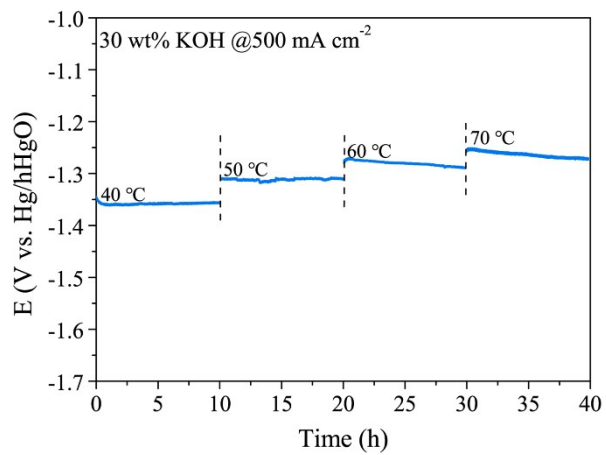

**Figure S19.** Chronopotentiometry curves without *iR* compensation of NiCoP/NiCoS<sub>x</sub>/NF electrode operated at different temperatures at 500 mA cm<sup>-2</sup> in 30% KOH solution.

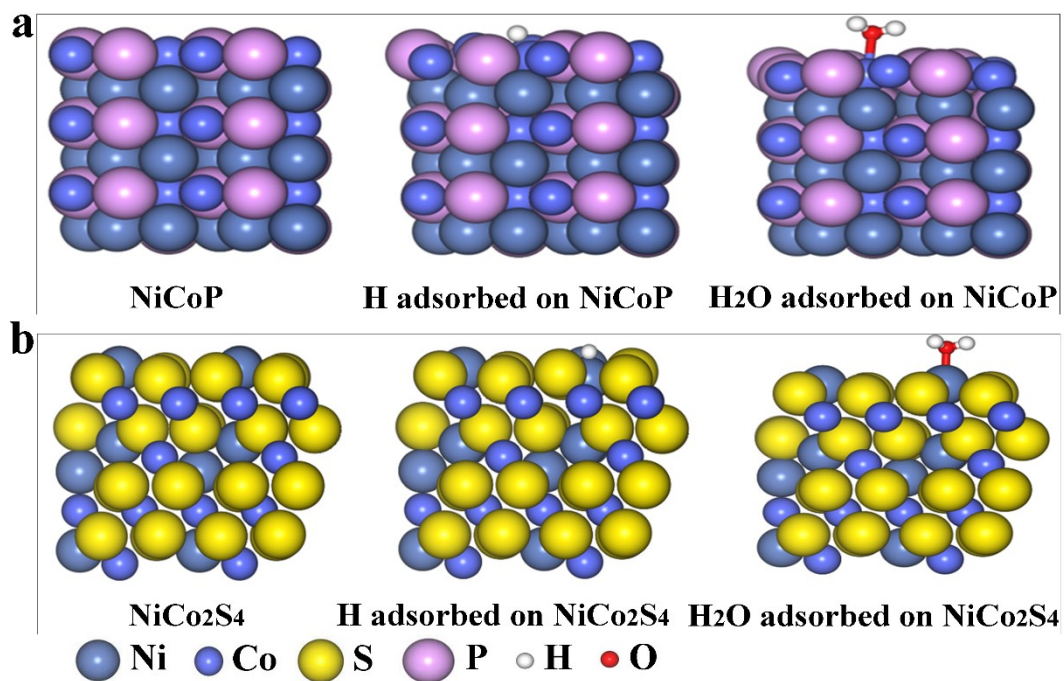

**Figure S20.** The optimized structure models for adsorption of intermediates ( $\text{H}^+$  and  $\text{H}_2\text{O}^+$ ) on the (a)  $\text{NiCo}_2\text{S}_4$  and (b)  $\text{NiCoP}$ , in which the indigo, blue, yellow, purple, white and red spheres refer to Ni, Co, S, P, H and O, respectively.

## References

1. G. Kresse and J. Hafner, *Phys. Rev. B*, 1993, **47**, 558-561.
2. G. Kresse and J. Hafner, *Phys. Rev. B*, 1994, **49**, 14251-14269.
3. G. Kresse and J. Furthmüller, *Phys. Rev. B*, 1996, **54**, 11169-11186.
4. A. Jain, G. Hautier, C. J. Moore, S. Ping Ong, C. C. Fischer, T. Mueller, K. A. Persson and G. Ceder, *Comput. Mater. Sci.*, 2011, **50**, 2295-2310.
